# Supplementary material for: Intermediate and low abundant protein analysis of vitamin D deficient obese and non-obese subjects by MALDI-profiling
Source: PubMed Central journal article supplement (PMC5626753; doi:10.1038/s41598-017-13020-z), 2017-10-03
Supplement: 41598_2017_13020_MOESM1_ESM.pdf [file 41598_2017_13020_MOESM1_ESM.pdf]

## **Intermediate and low abundant protein analysis of vitamin D deficient obese and non-obese subjects by MALDI-profiling**

Nasser M. Al-Daghri,<sup>1</sup> Enrica Torretta<sup>2</sup>, Daniele Capitanio<sup>2</sup>, Chiara Fania<sup>3</sup>, Franca Rosa Guerini<sup>4</sup>, Shaun B. Sabico<sup>1</sup>, Mario Clerici<sup>4,5</sup>,  
Cecilia Gelfi<sup>2,3,\*</sup>

1 Prince Mutaib Chair for Biomarkers of Osteoporosis, Biochemistry Department, College of Science, King Saud University, Riyadh 11451, Saudi Arabia;

2 Department of Biomedical Sciences for Health, University of Milan, Segrate (Milan), Italy;

3 Clinical Proteomics Unit, Scientific Institute for Research, Hospitalization and Health Care (IRCCS) Policlinico San Donato, San Donato Milanese (Milan), Italy;

4 Don C. Gnocchi Foundation, IRCCS, Milan, Italy.

5 Department of Physiopathology and Transplants, University of Milan, Milan, Italy;

\* [cecilia.gelfi@unimi.it](mailto:cecilia.gelfi@unimi.it)

**Supplementary table S1.** Differentially expressed peaks ( $p < 0.05$ ) obtained by comparing high and low BMI subjects after Hu7 immunodepletion. m/z, p-values of the Wilcoxon test, and averages areas for each dysregulated peak are indicated.

| m/z   | p-value  | High BMI<br>Average<br>expression | Low BMI<br>Average<br>expression |
|-------|----------|-----------------------------------|----------------------------------|
| 2110  | 0.00621  | 25.28                             | 21.74                            |
| 2159  | 0.0488   | 24.28                             | 20.92                            |
| 2172  | 0.0131   | 30.82                             | 25.88                            |
| 2737  | 0.0435   | 34.20                             | 40.39                            |
| 3406  | 0.00151  | 46.14                             | 59.42                            |
| 3422  | 0.0144   | 39.40                             | 46.86                            |
| 3777  | 0.037    | 39.35                             | 44.93                            |
| 4672  | 0.0488   | 69.08                             | 61.93                            |
| 5107  | 0.0228   | 93.41                             | 103.15                           |
| 5271  | 0.0354   | 49.45                             | 64.41                            |
| 5292  | 0.00204  | 24.72                             | 30.99                            |
| 5487  | 0.0354   | 94.85                             | 79.70                            |
| 7285  | 0.0488   | 41.09                             | 34.56                            |
| 12875 | 0.000845 | 98.25                             | 82.57                            |

**Supplementary table S2.** Differentially expressed peaks ( $p < 0.05$ ) obtained by comparing high and low BMI subjects after Hu14 immunodepletion. m/z, p-values of the Wilcoxon test, and averages areas for each dysregulated peak are indicated.

| m/z  | p-value    | High BMI<br>Average<br>expression | Low BMI<br>Average<br>expression |
|------|------------|-----------------------------------|----------------------------------|
| 1530 | 0.00000555 | 107.81                            | 181.11                           |
| 1556 | < 0.000001 | 104.57                            | 210.67                           |
| 1582 | < 0.000001 | 78.49                             | 165.00                           |
| 1655 | 0.0345     | 46.79                             | 43.30                            |
| 1716 | 0.0303     | 34.73                             | 38.59                            |
| 1735 | 0.00213    | 38.80                             | 44.53                            |
| 1773 | 0.00168    | 54.44                             | 64.13                            |
| 1796 | 0.000406   | 55.96                             | 68.33                            |
| 1818 | 0.0000755  | 43.84                             | 53.48                            |
| 1913 | 0.00497    | 35.86                             | 31.95                            |
| 2046 | 0.00125    | 50.56                             | 59.77                            |
| 2059 | 0.0000117  | 44.52                             | 57.96                            |
| 2111 | 0.0000646  | 57.50                             | 68.37                            |
| 2135 | 0.0283     | 24.46                             | 26.98                            |
| 2325 | 0.00191    | 45.43                             | 55.01                            |
| 2692 | 0.00326    | 28.20                             | 24.93                            |
| 3219 | 0.0187     | 29.48                             | 27.18                            |
| 3358 | 0.000504   | 41.67                             | 37.1                             |
| 3700 | 0.000776   | 30.85                             | 26.28                            |
| 3861 | 0.0018     | 33.34                             | 29.34                            |
| 3874 | 0.029      | 18.94                             | 17.38                            |
| 3956 | 0.0038     | 46.50                             | 42.16                            |
| 3999 | 0.00416    | 24.49                             | 22.77                            |
| 4139 | 0.000534   | 27.00                             | 22.76                            |
| 4164 | 0.0015     | 32.78                             | 29.91                            |
| 4342 | 0.000064   | 37.25                             | 31.60                            |
| 4516 | < 0.000001 | 71.84                             | 59.33                            |

|       |            |       |       |
|-------|------------|-------|-------|
| 4558  | 0.00000127 | 33.50 | 27.41 |
| 4581  | 0.00052    | 30.94 | 27.50 |
| 4672  | 0.00912    | 30.95 | 27.85 |
| 4711  | 0.0000109  | 57.33 | 49.1  |
| 4816  | 0.0333     | 26.41 | 28.87 |
| 5152  | 0.000881   | 36.56 | 32.79 |
| 5292  | 0.00734    | 37.19 | 33.72 |
| 5428  | 0.00855    | 40.72 | 38.23 |
| 5494  | 0.0419     | 26.91 | 24.32 |
| 5528  | 0.00356    | 34.80 | 29.84 |
| 5710  | 0.0000835  | 26.31 | 22.15 |
| 6140  | 0.0000117  | 21.37 | 17.84 |
| 6619  | 0.000881   | 26.82 | 23.42 |
| 6717  | 0.0457     | 24.90 | 22.91 |
| 7037  | 0.000136   | 30.50 | 26.49 |
| 7235  | 0.00391    | 38.25 | 51.89 |
| 7686  | 0.0271     | 26.04 | 23.58 |
| 7732  | 0.0125     | 22.09 | 19.77 |
| 7974  | 0.00297    | 54.56 | 47.69 |
| 8178  | 0.00213    | 28.06 | 24.99 |
| 8277  | 0.0338     | 27.18 | 25.40 |
| 8373  | 0.0128     | 17.71 | 16.31 |
| 8393  | 0.00326    | 45.01 | 41.58 |
| 8613  | 0.0000148  | 37.95 | 30.95 |
| 8631  | 0.0000616  | 25.92 | 21.31 |
| 8728  | 0.00000932 | 26.67 | 21.30 |
| 8936  | < 0.000001 | 19.07 | 14.24 |
| 10856 | 0.002      | 34.33 | 30.02 |
| 10925 | 0.014      | 21.68 | 19.10 |
| 10951 | 0.0000467  | 29.92 | 25.66 |
| 11232 | 0.002      | 47.89 | 43.16 |
| 12049 | 0.000534   | 58.65 | 50.70 |
| 12752 | 0.00894    | 21.73 | 19.77 |

|       |           |        |        |
|-------|-----------|--------|--------|
| 12893 | 0.0387    | 19.68  | 18.51  |
| 12910 | 0.000769  | 16.86  | 14.84  |
| 12984 | 0.00297   | 39.18  | 34.83  |
| 13292 | 0.0308    | 159.93 | 171.41 |
| 13412 | 0.000534  | 44.36  | 40.03  |
| 13463 | 0.000458  | 66.10  | 58.78  |
| 13562 | 0.00212   | 22.83  | 20.27  |
| 13726 | 0.000473  | 34.45  | 30.51  |
| 13807 | 0.0108    | 25.04  | 22.37  |
| 13834 | 0.00213   | 18.57  | 16.03  |
| 13865 | 0.0000688 | 18.97  | 15.94  |
| 14385 | 0.000064  | 42.70  | 36.19  |
| 14527 | 0.0277    | 34.34  | 31.51  |
| 14595 | 0.00628   | 99.58  | 90.24  |
| 14788 | 0.0093    | 36.68  | 32.94  |
| 15215 | 0.000072  | 48.20  | 41.24  |
| 15277 | 0.002     | 31.16  | 27.42  |
| 15537 | 0.000032  | 41.24  | 34.56  |
| 15942 | 0.0000143 | 49.03  | 39.97  |
| 16505 | 0.0000117 | 107.9  | 135.45 |
| 16904 | 0.00091   | 56.21  | 49.79  |
| 16990 | 0.00155   | 27.16  | 23.63  |
| 17113 | 0.00227   | 86.23  | 77.39  |
| 17224 | 0.0258    | 92.25  | 85.84  |
| 17368 | 0.00645   | 27.22  | 24.30  |
| 17993 | 0.000016  | 27.61  | 23.86  |
| 18046 | 0.000534  | 49.70  | 43.82  |
| 18415 | 0.0000328 | 48.31  | 41.29  |
| 19166 | 0.0022    | 42.82  | 37.63  |
| 19201 | 0.000939  | 31.54  | 27.74  |
| 20278 | 0.000101  | 71.11  | 59.61  |
| 21349 | 0.0000781 | 37.24  | 31.13  |
| 21393 | 0.0016    | 51.95  | 45.08  |

|       |            |       |       |
|-------|------------|-------|-------|
| 23233 | 0.0000148  | 73.90 | 62.00 |
| 25379 | 0.000109   | 55.23 | 47.15 |
| 25495 | 0.000185   | 66.57 | 57.13 |
| 25706 | 0.0000117  | 45.79 | 38.47 |
| 25773 | 0.0000117  | 33.79 | 28.14 |
| 25820 | 0.0000148  | 27.6  | 22.65 |
| 26099 | 0.0373     | 34.27 | 31.56 |
| 26268 | 0.00119    | 27.41 | 23.28 |
| 26317 | 0.0029     | 34.67 | 30.16 |
| 26510 | 0.00000475 | 72.93 | 59.25 |
| 26574 | 0.0000419  | 36.14 | 29.47 |
| 26637 | 0.0000634  | 42.45 | 35.42 |
| 26770 | 0.000348   | 54.91 | 47.25 |
| 27538 | 0.0000667  | 45.39 | 37.70 |
| 28481 | 0.000534   | 33.88 | 28.85 |
| 28567 | 0.000032   | 52.66 | 44.25 |
| 28852 | 0.000337   | 26.24 | 22.22 |
| 28967 | 0.002      | 55.64 | 48.07 |
| 29122 | 0.0000506  | 63.85 | 54.68 |
| 29283 | 0.0000549  | 39.20 | 33.72 |
| 29431 | 0.00453    | 32.95 | 29.03 |
| 29580 | 0.000337   | 49.73 | 43.13 |
| 29668 | 0.000545   | 30.55 | 26.23 |
| 29885 | 0.0000281  | 39.70 | 33.47 |
| 29942 | 0.000163   | 53.93 | 45.49 |
| 30110 | 0.00191    | 35.67 | 31.15 |
| 30566 | 0.0000581  | 57.87 | 47.89 |
| 31700 | 0.0000598  | 71.78 | 58.53 |

**Supplementary Table S3. Peptide identification.** Mass spectrometry data concerning proteins identified after by LC-MS/MS are shown together with protein Uniprot accession number.

| Name                            | Uniprot AC | Measured m/z | Theoretical mass | Charge status | Calculated mass | D      | Mascot Score | Peptide sequence                    |
|---------------------------------|------------|--------------|------------------|---------------|-----------------|--------|--------------|-------------------------------------|
| <b>Apolipoprotein CIII</b>      | P02656     | 858,9406     | 1.715,8667       | 2             | 1715,8438       | 0,0228 | 27,54        | DALSSVQESQVAQQAR                    |
|                                 |            | 887,4456     | 1.772,8766       | 2             | 1772,8653       | 0,0113 | 47,5         | DALSSVQESQVAQQARG                   |
| <b>Apolipoprotein B100</b>      | P04114     | 899,0645     | 1.796,1145       | 2             | 1796,0924       | 0,0221 | 45,71        | TLILPSLELPVLHVPR                    |
|                                 |            | 1.024,1138   | 2.046,2130       | 2             | 2046,1877       | 0,0253 | 40,85        | SYTLILPSLELPVLHVPR                  |
|                                 |            | 528,3505     | 1.582,0297       | 3             | 1581,9341       | 0,0956 | 20,86        | AIANIIDEIIEKLLK                     |
| <b>Alpha-1-antichymotrypsin</b> | P01011     | 868,9025     | 1.735,7904       | 2             | 1735,7649       | 0,0255 | 26,95        | HPNSPLDEENLTQEN                     |
|                                 |            | 606,9634     | 1.817,8683       | 3             | 1817,8584       | 0,0099 | 24,84        | AKRLYGSEAFATDFQD                    |
|                                 |            | 712,6609     | 2.134,9610       | 3             | 2134,9515       | 0,0095 | 27,36        | HPNSPLDEENLTQENQDR                  |
|                                 |            | 756,4139     | 3777,033         | 5             | 3777,0141       | 0,0189 | 20,01        | GTHVDLGLASANVDFAFSLYKQLVLKAPDKNVIFS |
|                                 |            | 704,6918     | 2111,0537        | 3             | 2111,0358       | 0,0179 | 26,24        | PTDTQNIFFMKVTNPQK                   |
| <b>Complement C3</b>            | P01024     | 724,9554     | 2171,8443        | 3             | 2171,8338       | 0,0106 | 26,92        | EHWPEEDECQDEENQKQ                   |

**Supplementary Data.** Full-length blot images.

**A) Apo CIII**

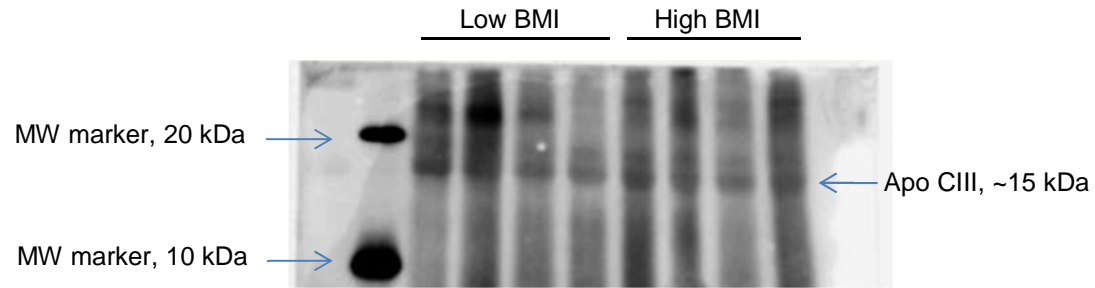

**B) LPL**

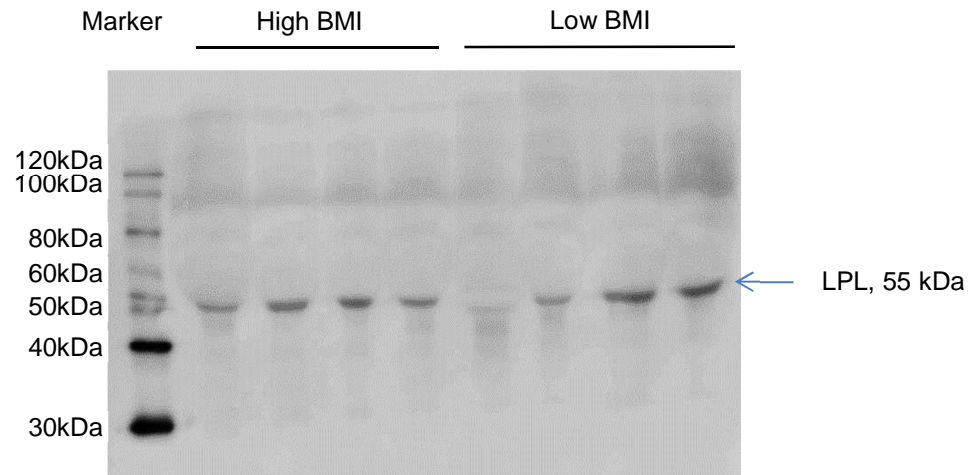



**C) Apo B100**

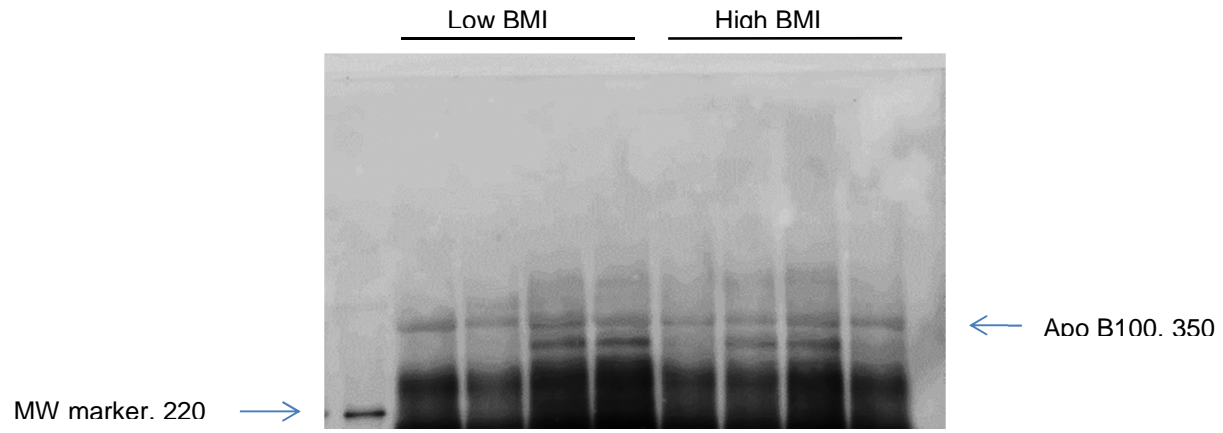

**D) AACT**

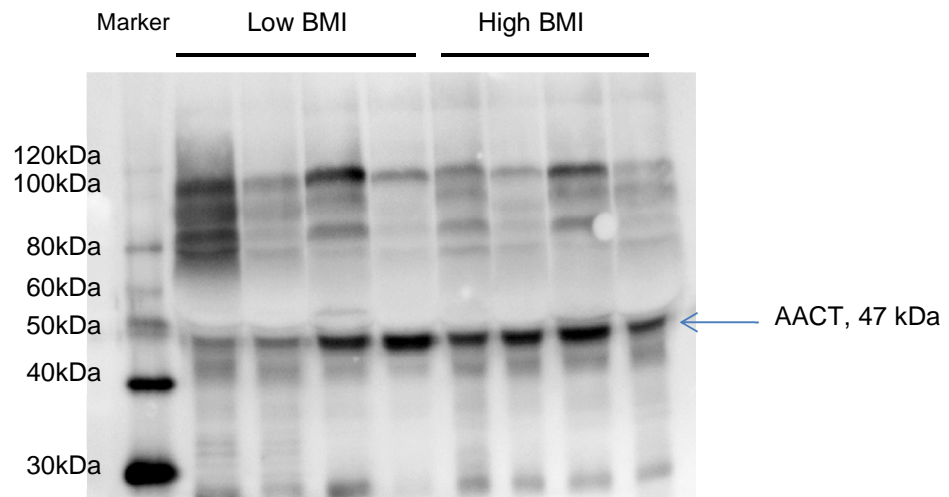

Total Stain for A), B), C) and D)

Low BMI

High BMI

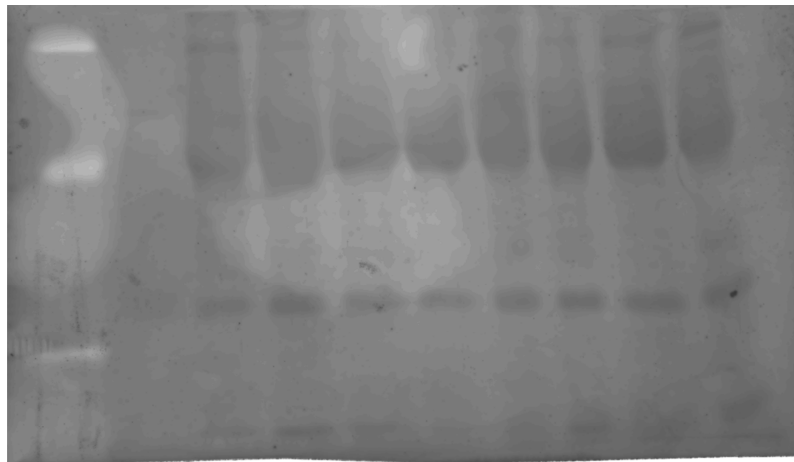

**E) Apo A1.**

In the upper panel the results of Apo A1 blotting is shown. In the lower panel the same image was more contrasted in order to better indicate the MW marker at 30 kDa.

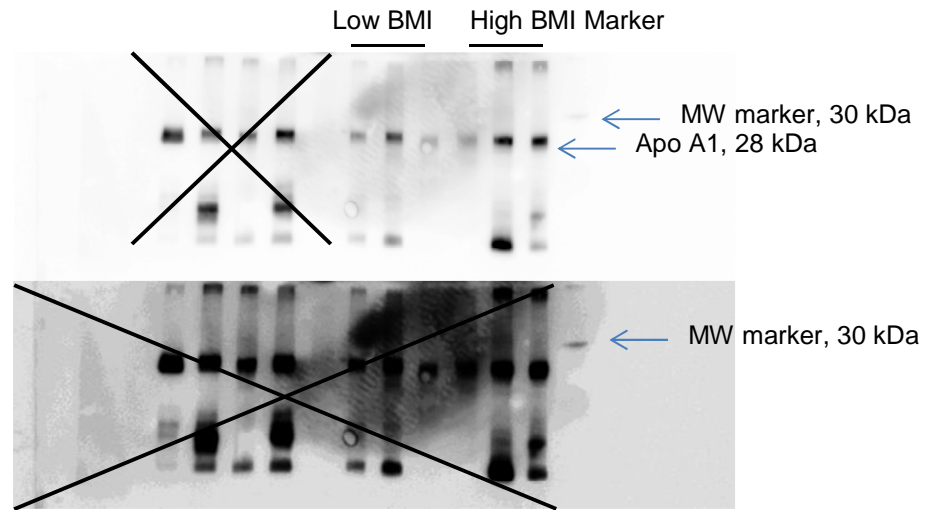

**Total stain for E)**

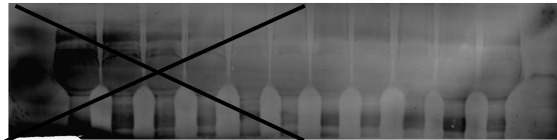

F) CC3

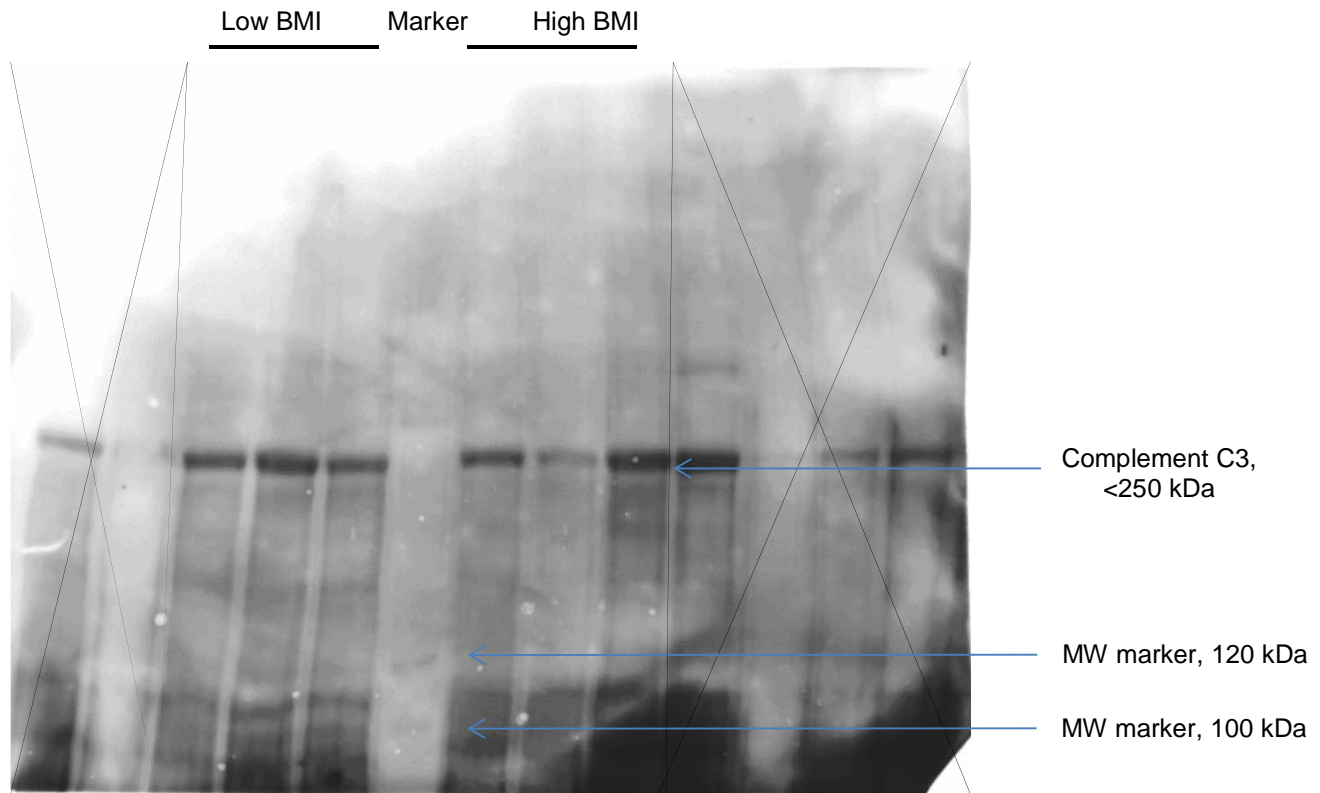

Total stain for F)

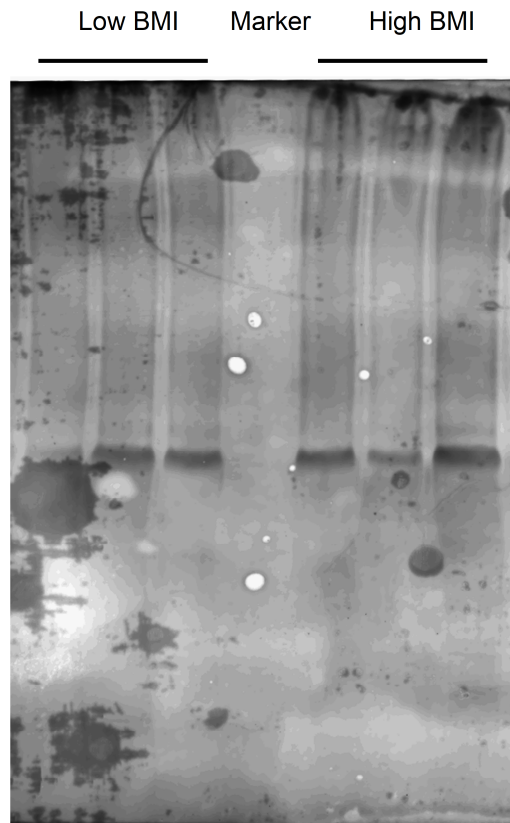

**Densitometric scanning data with statistical analysis** for all the intact proteins assessed by immunoblotting. Band intensities were detected using an Image Quant LAS 4000 mini imager (GE Healthcare) and assessed with the Image Quant TL 8.1 analysis software (GE Healthcare). The data were normalized against the total amount of proteins stained by Sypro Ruby and subjected to a Student's t-test.

| <b>Apo A1</b> |            | normalised volumes |              |      |         |        |
|---------------|------------|--------------------|--------------|------|---------|--------|
|               |            | replicate #1       | replicate #2 | mean | st. dev | t-test |
| low BMI       | subpool #1 | 16,2               | 17,9         | 17,7 | 1,5     | 0,006  |
|               | subpool #2 | 20,0               | 16,9         |      |         |        |
|               | subpool #3 | 16,6               | 18,8         |      |         |        |
| high BMI      | subpool #1 | 21,0               | 18,2         | 20,7 | 1,4     |        |
|               | subpool #2 | 22,2               | 21,0         |      |         |        |
|               | subpool #3 | 21,7               | 19,9         |      |         |        |

| <b>Apo CIII</b> |            | normalised volumes |              |      |         |        |
|-----------------|------------|--------------------|--------------|------|---------|--------|
|                 |            | replicate #1       | replicate #2 | mean | st. dev | t-test |
| low BMI         | subpool #1 | 100,8              | 69,8         | 55,4 | 24,8    | 0,049  |
|                 | subpool #2 | 69,0               | 65,6         |      |         |        |
|                 | subpool #3 | 33,4               | 35,3         |      |         |        |
|                 | subpool #4 | 34,7               | 34,6         |      |         |        |
| high BMI        | subpool #1 | 42,3               | 47,8         | 35,6 | 7,6     |        |
|                 | subpool #2 | 40,3               | 37,0         |      |         |        |
|                 | subpool #3 | 25,6               | 27,6         |      |         |        |
|                 | subpool #4 | 32,1               | 32,0         |      |         |        |

| <b>Apo B100</b> |            | normalised volumes |              |      |         |        |
|-----------------|------------|--------------------|--------------|------|---------|--------|
|                 |            | replicate #1       | replicate #2 | mean | st. dev | t-test |
| low BMI         | subpool #1 | 37,2               | 36,0         | 37,1 | 8,0     | 0,664  |
|                 | subpool #2 | 27,7               | 28,1         |      |         |        |
|                 | subpool #3 | 49,1               | 48,2         |      |         |        |
|                 | subpool #4 | 34,6               | 35,8         |      |         |        |
| high BMI        | subpool #1 | 41,7               | 39,7         | 38,6 | 5,9     |        |
|                 | subpool #2 | 28,5               | 30,1         |      |         |        |
|                 | subpool #3 | 43,4               | 42,0         |      |         |        |
|                 | subpool #4 | 41,5               | 42,3         |      |         |        |

| <b>LPL</b> |            | normalised volumes |              |      |         |        |
|------------|------------|--------------------|--------------|------|---------|--------|
|            |            | replicate #1       | replicate #2 | mean | st. dev | t-test |
| low BMI    | subpool #1 | 40,8               | 40,7         | 22,3 | 15,6    | 0,040  |
|            | subpool #2 | 37,3               | 20,3         |      |         |        |
|            | subpool #3 | 21,2               | 6,6          |      |         |        |
|            | subpool #4 | 7,5                | 3,9          |      |         |        |
| high BMI   | subpool #1 | 32,4               | 33,6         | 45,6 | 24,6    |        |
|            | subpool #2 | 105,1              | 32,3         |      |         |        |
|            | subpool #3 | 41,3               | 47,6         |      |         |        |
|            | subpool #4 | 36,9               | 36,0         |      |         |        |

| <b>AACT</b> |            | normalised volumes |              |      |         |        |
|-------------|------------|--------------------|--------------|------|---------|--------|
|             |            | replicate #1       | replicate #2 | mean | st. dev | t-test |
| low BMI     | subpool #1 | 53,7               | 52,7         | 59,2 | 8,5     | 0,043  |
|             | subpool #2 | 56,6               | 53,1         |      |         |        |
|             | subpool #3 | 59,0               | 58,9         |      |         |        |
|             | subpool #4 | 79,0               | 60,3         |      |         |        |
| high BMI    | subpool #1 | 64,7               | 63,8         | 67,1 | 5,3     |        |
|             | subpool #2 | 65,5               | 65,4         |      |         |        |
|             | subpool #3 | 75,4               | 75,5         |      |         |        |
|             | subpool #4 | 64,1               | 62,2         |      |         |        |

| <b>CC3</b> |            | normalised volumes |              |       |         |        |
|------------|------------|--------------------|--------------|-------|---------|--------|
|            |            | replicate #1       | replicate #2 | mean  | st. dev | t-test |
| low BMI    | subpool #1 | 89,9               | 88,9         | 121,7 | 27,5    | 0,0007 |
|            | subpool #2 | 152,0              | 148,9        |       |         |        |
|            | subpool #3 | 127,8              | 122,5        |       |         |        |
| high BMI   | subpool #1 | 41,3               | 39,4         | 43,8  | 28,0    |        |
|            | subpool #2 | 15,7               | 13,1         |       |         |        |
|            | subpool #3 | 77,7               | 75,7         |       |         |        |
